# Supplementary material for: A chloroquine-induced macrophage-preconditioning strategy for improved nanodelivery
Source: PubMed Central journal article supplement (PMC5653759; doi:10.1038/s41598-017-14221-2), 2017-10-23
Supplement: 41598_2017_14221_MOESM1_ESM.pdf [file 41598_2017_14221_MOESM1_ESM.pdf]

## SUPPLEMENTARY INFORMATION

### **A chloroquine-induced macrophage-preconditioning strategy for improved nanodelivery**

Joy Wolfram<sup>1,2,\*</sup>, Sara Nizzero<sup>1,3</sup>, Haoran Liu<sup>1</sup>, Feng Li<sup>1</sup>, Guodong Zhang<sup>1</sup>, Zheng Li<sup>1</sup>, Haifa Shen<sup>1,4</sup>, Elvin Blanco<sup>1</sup>, Mauro Ferrari<sup>1,5,\*</sup>

<sup>1</sup>*Department of Nanomedicine, Houston Methodist Research Institute, Houston, TX 77030, USA.*

<sup>2</sup>*Department of Transplantation, Mayo Clinic, Jacksonville, FL 32224, USA.*

<sup>3</sup>*Applied Physics Graduate Program, Rice University, Houston, TX 77005, USA.*

<sup>4</sup>*Department of Cell and Developmental Biology, Weill Cornell Medicine, New York, NY 10065, USA.*

<sup>5</sup>*Department of Medicine, Weill Cornell Medicine, Weill Cornell Medicine, New York, NY 10065, USA.*

*\*Corresponding authors.*

## Supplementary figures

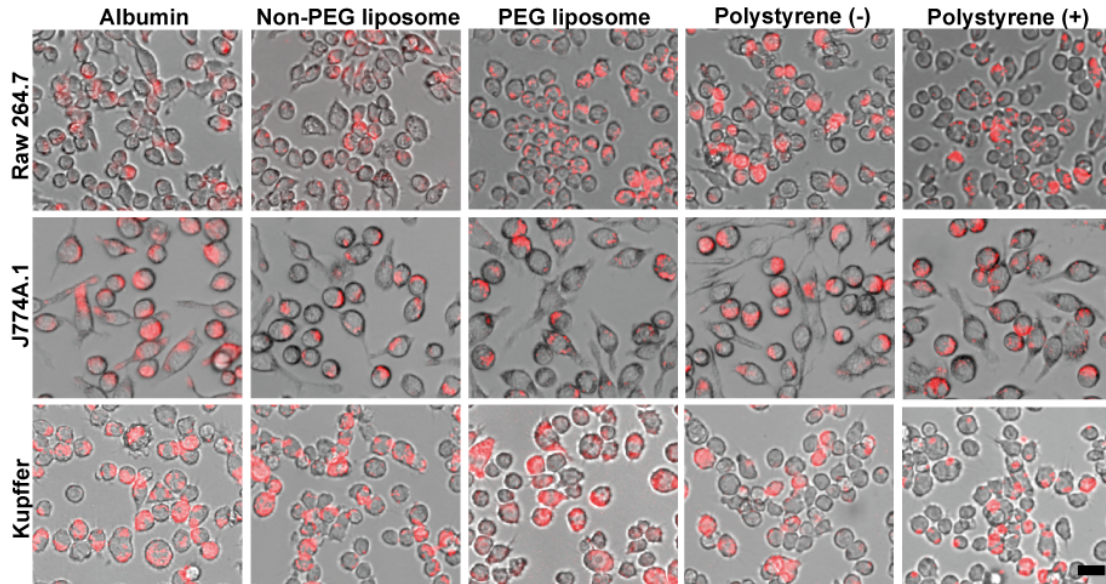

**Supplementary Figure 1 | Nanoparticle uptake in macrophages.** Fluorescence microscopy images of nanoparticle uptake in Raw 264.7 cells, J774A.1 cells, and Kupffer cells. Scale bar, 20  $\mu\text{m}$ .

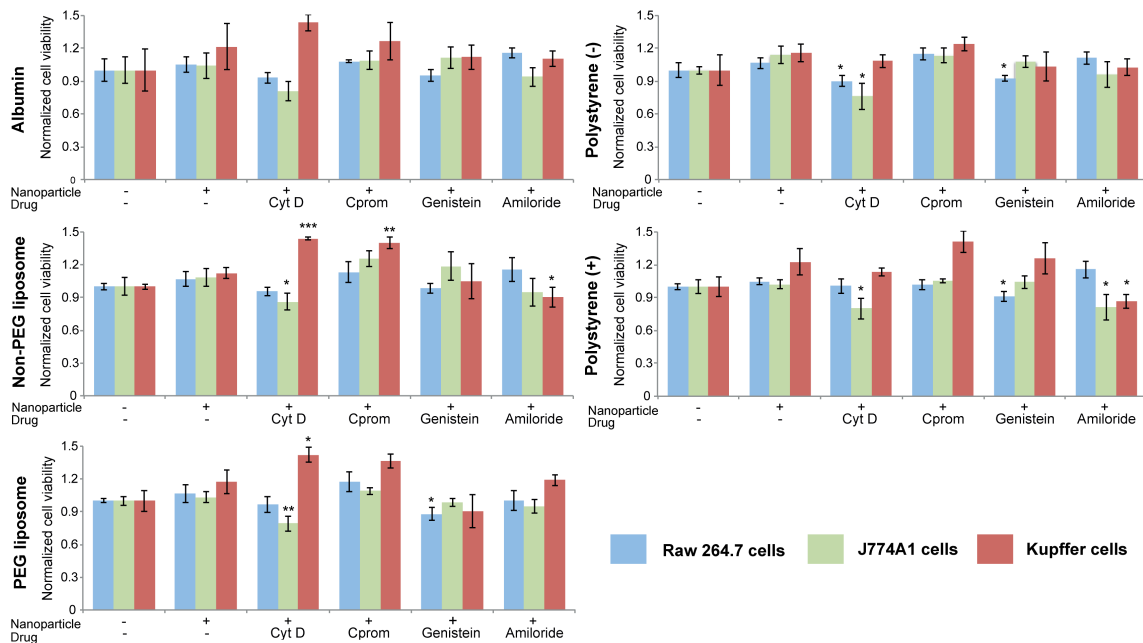

**Supplementary Figure 2 | Viability of macrophages in response to nanoparticles and uptake inhibitors.** Raw 264.7, J774A.1 and Kupffer cells were pretreated with inhibitors (30 min) prior to nanoparticle exposure (3 h or 6 h). Values are normalized to those of control cells. Data is presented as mean  $\pm$  s.d. of triplicates. Statistics by Student's *t*-test. \*,  $P < 0.05$ ; \*\*,  $P < 0.01$ ; \*\*\*,  $P < 0.001$ , compared with cells exposed to nanoparticles. Cprom, chlorpromazine; CytD, cytochalasin D.

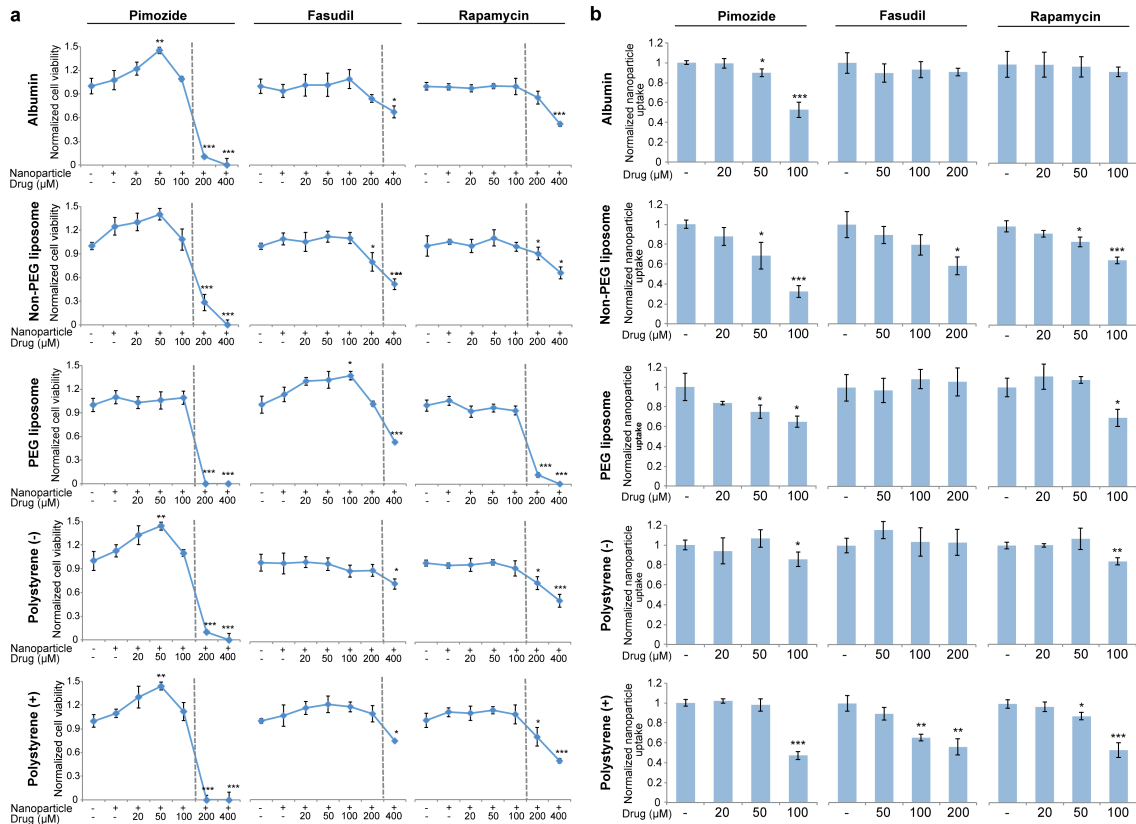

**Supplementary Figure 3 | Effect of pimozone, Fasudil, and rapamycin on nanoparticle uptake in Raw 264.7 cells. (a) Cell viability upon exposure to drugs and nanoparticles. The left side of the dashed line indicates drug concentrations used in the nanoparticle uptake study. (b) Effect of drugs on nanoparticles uptake in cells. Values are normalized to those of control cells. Data is presented as mean  $\pm$  s.d. of triplicates. Statistics by Student's *t*-test. \*,  $P < 0.05$ ; \*\*,  $P < 0.01$ ; \*\*\*,  $P < 0.001$ , compared with cells exposed to nanoparticles.**

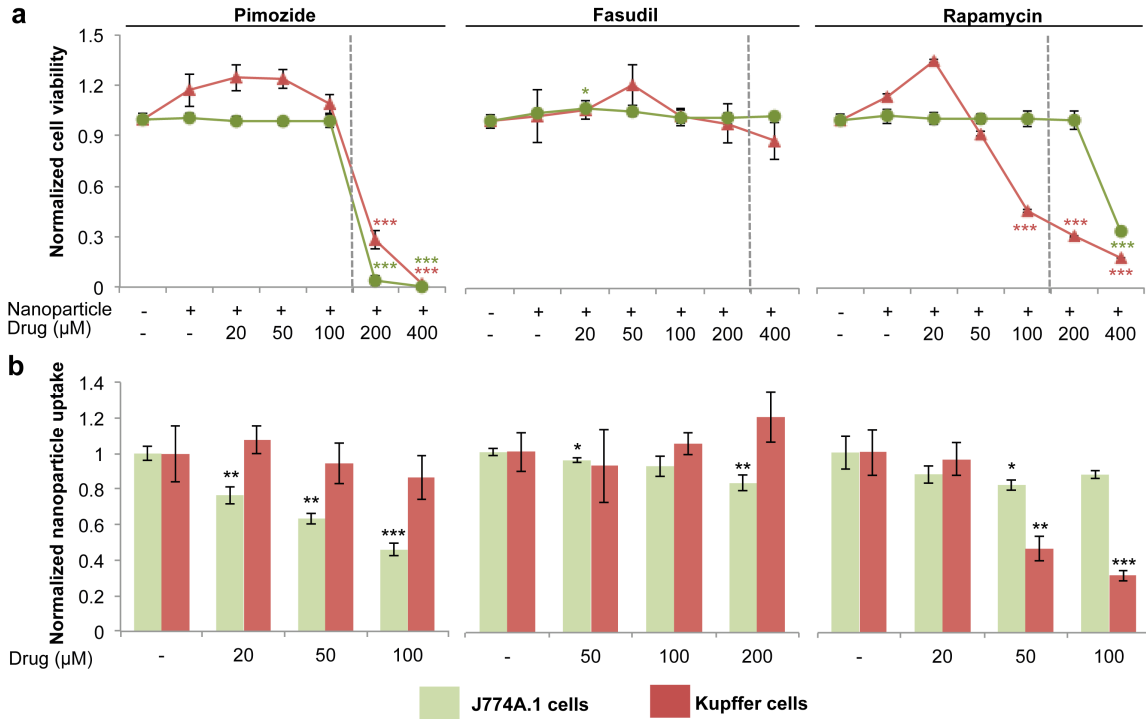

**Supplementary Figure 4 | Effect of pimozone, Fasudil, and rapamycin on liposome uptake in J774A.1 and Kupffer cells.** (a) Cell viability upon exposure to drugs and liposomes. The left side of the dashed line indicates drug concentrations used in the liposome uptake study. (b) Effect of drugs on liposome uptake in cells. Values are normalized to those of control cells. Data is presented as mean  $\pm$  s.d. of triplicates. Statistics by Student's *t*-test. \*,  $P < 0.05$ ; \*\*,  $P < 0.01$ ; \*\*\*,  $P < 0.001$ , compared with cells exposed to nanoparticles.

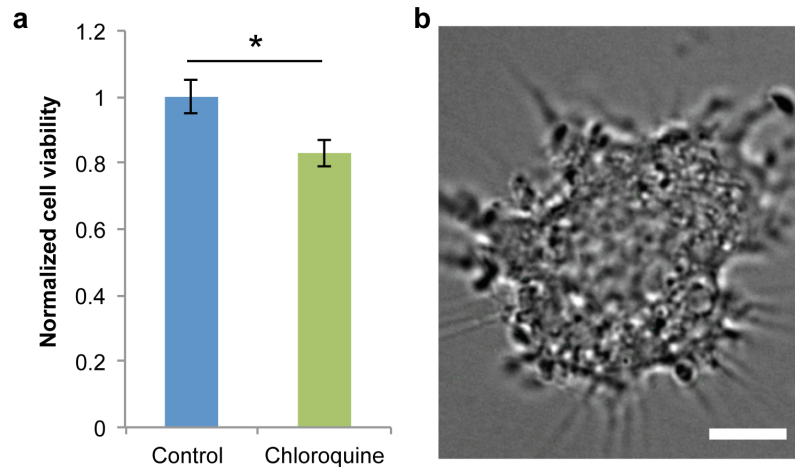

**Supplementary Figure 5 | Ability of Kupffer cells to recover from chloroquine treatment.** Kupffer cells were exposed to 100  $\mu$ M chloroquine for 3 h, after which cells were incubated with fresh media for 24 h. (a) Cell viability. Values are normalized to those of control cells. Data is presented as mean  $\pm$  s.d. ( $n = 5$ ). Statistics by Student's *t*-test. \*,  $P < 0.05$ . (b) Microscopy image of a live cell. Scale bar, 10  $\mu$ m.



**a**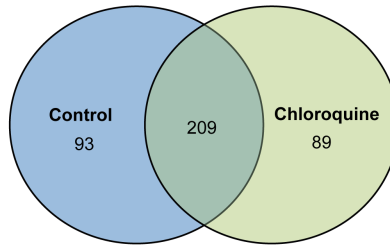**b**

| Control                                                         | Chloroquine                                                         |
|-----------------------------------------------------------------|---------------------------------------------------------------------|
| Actin, gamma-enteric smooth muscle (ACTG2)                      | Actin, aortic smooth muscle (ACTA2)                                 |
| Tubulin beta-4B chain (TUBB4B)                                  | Tubulin alpha-1C chain (TUBA1C)                                     |
| Tubulin alpha-1A chain (TUBA1A)                                 | Cyclin-dependent kinase 1 (CDK1)                                    |
| EF-hand domain-containing protein D2 (EFHD2)                    | 40S ribosomal protein S18 (RPS18)                                   |
| Adenosylhomocysteinase (AHCY)                                   | Ras GTPase-activating protein 1 (RASA1)                             |
| 60S ribosomal protein L5 (RPL5)                                 | Voltage-dependent anion-selective channel protein 1 (VDAC1)         |
| Leucine-rich repeat-containing protein 59 (LRRC59)              | Brain acid soluble protein 1 (BASP1)                                |
| Actin-related protein (ACTR3)                                   | Transformer-2 protein homolog beta (TRA2B)                          |
| Malignant T-cell-amplified sequence 1 (MCTS1)                   | Coatomer subunit gamma (COPG)                                       |
| Coatomer subunit beta' (COPB2)                                  | Nucleoside diphosphate kinase B (NME2)                              |
| 60S ribosomal protein L3 (RPL3)                                 | Eukaryotic translation initiation factor 3 subunit C (EIF3C)        |
| F-actin-capping protein subunit alpha-2 (CAPZA2)                | Dynamin-1-like protein (DNM1)                                       |
| Nuclear migration protein nudC (NUDC)                           | Fumarate hydratase, mitochondrial (FH)                              |
| Eukaryotic translation initiation factor 3 subunit B (EIF3B)    | Tyrosine-protein phosphatase non-receptor type 6 (PTPN6)            |
| Phosphatidylinositol-binding clathrin assembly protein (PICALM) | Isocitrate dehydrogenase [NAD] subunit alpha, mitochondrial (IDH3A) |
| C-1-tetrahydrofolate synthase, cytoplasmic (MTHFD)              | Alpha-actinin-1 (ACTN1)                                             |
| Translocon-associated protein subunit alpha (SSR1)              | Proteasome subunit alpha type-1 (PSMA1)                             |
| Nucleobindin-1 (NUCB1)                                          | Unconventional myosin-1e (MYO1E)                                    |
| Nucleoside diphosphate kinase A (NME1)                          | 28 kDa heat- and acid-stable phosphoprotein (PDAP1)                 |
| 40S ribosomal protein S3a (RPS3A)                               |                                                                     |
| Proteasome subunit alpha type-7 (PSMA7)                         |                                                                     |
| Coiled-coil domain-containing protein 47 (CCDC47)               |                                                                     |
| Glucose-6-phosphate 1-dehydrogenase (G6PDX)                     |                                                                     |
| Renin receptor (ATP6AP2)                                        |                                                                     |
| Phosphoglucomutase-1 (PGM1)                                     |                                                                     |

**Supplementary Figure 6 | Protein expression in Kupffer cells in response to chloroquine.** Protein lysates were analyzed with liquid chromatography tandem-mass spectrometry (LC-MS/MS) (a) Circles represent the amount of proteins expressed in each group. Proteins with a score  $\geq 30$  were considered. (b) Table of proteins exclusively detected in control cells and chloroquine-treated (100  $\mu$ M) cells. Proteins with a score  $\geq 30$  and # of unique peptide  $\geq 2$  are presented.

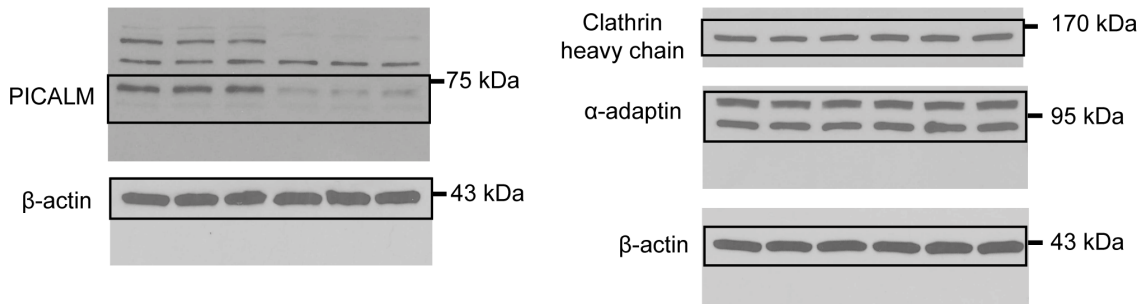

**Supplementary Figure 7 | Uncropped Western blot images.** PICALM, phosphatidylinositol-binding clathrin assembly protein.

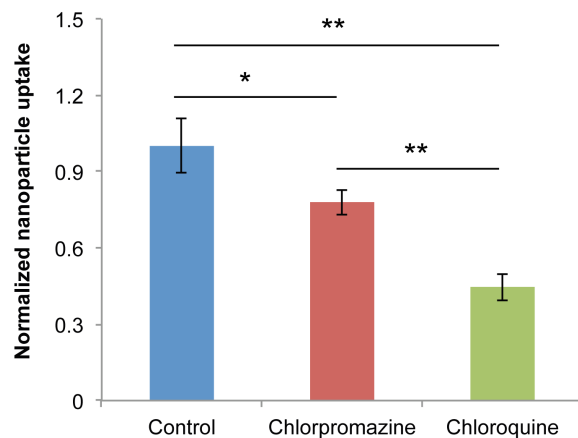

**Supplementary Figure 8 | Suppression of liposome uptake in Kupffer cells.** Cells were treated with chlorpromazine (30  $\mu$ M) or chloroquine (100  $\mu$ M). Chloroquine data from Fig. 2 is included for comparison purposes. Values are normalized to those of control cells. Data is presented as mean  $\pm$  s.d. of triplicates. Statistics by Student's *t*-test. \*,  $P < 0.05$ ; \*\*,  $P < 0.01$ .

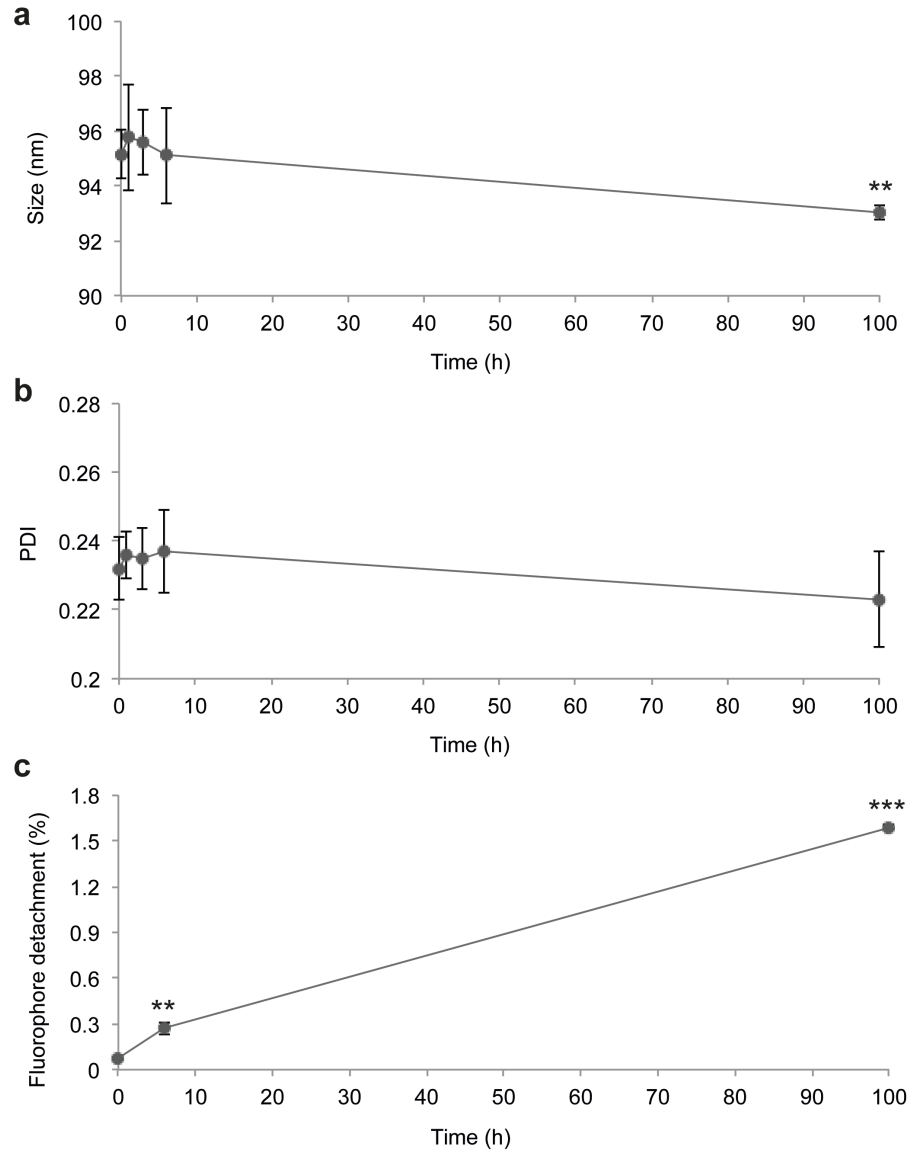

**Supplementary Figure 9 | Liposome stability under physiological conditions.** Liposomes were mixed with 10% fetal bovine serum (FBS) at 37°C for various time points. The size (**a**) and polydispersity index (**b**) of liposomes were measured by dynamic light scattering. Data is presented as mean  $\pm$  s.d. of five measurements. (**c**) Fluorophore detachment from liposomes. Statistics by Student's *t*-test.  $P < 0.01$ ; \*\*\*,  $P < 0.001$ , compared to 0 h.

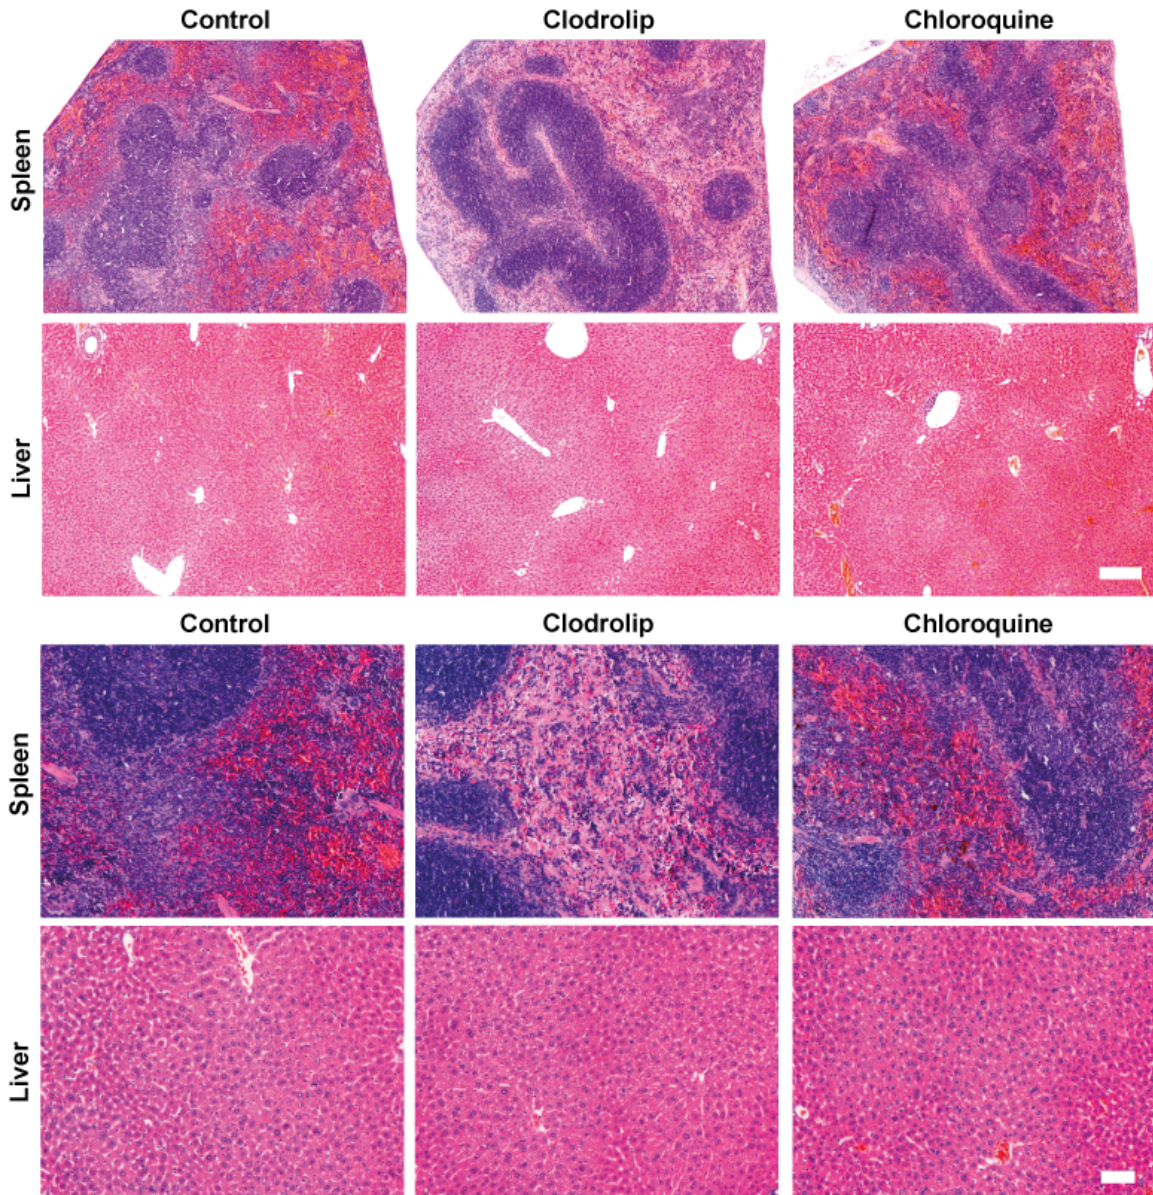

**Supplementary Figure 10 | Hematoxylin and eosin (H&E) staining of spleen and liver tissues.** Athymic nude mice were intravenously injected with phosphate buffered saline (PBS), clodronate liposomes (clodrolip; 50 mg/kg clodronate for 1 day), or chloroquine (60 mg/kg/day for 7 days). Scale bar, 250  $\mu$ m (upper), 100  $\mu$ m (lower).



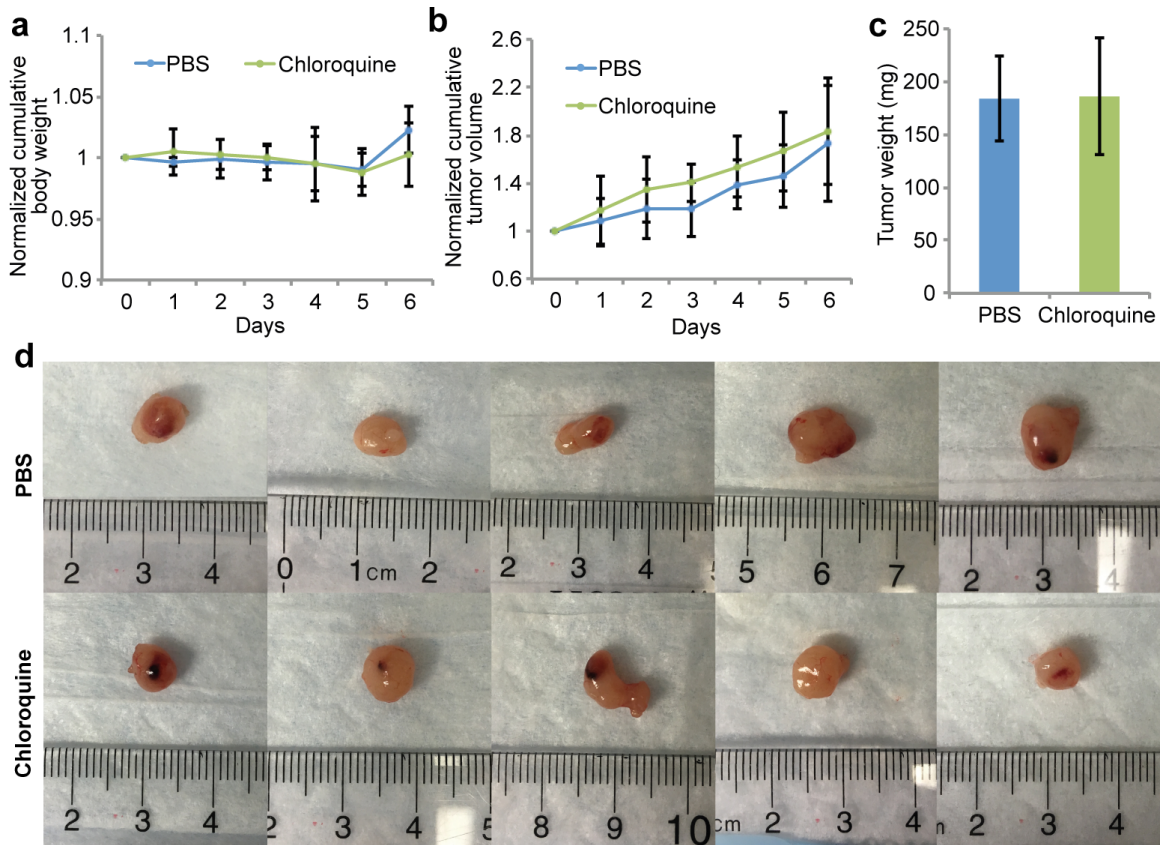

**Supplementary Figure 11 | Effect of chloroquine pretreatment on body weight and tumor growth.** Athymic nude mice bearing MDA-MB-231 orthotopic breast tumors were treated with chloroquine for 7 days (60 mg/kg/day). **(a)** Normalized cumulative body weight. **(b)** Normalized cumulative tumor volume. **(c)** Tumor weight at the end of the treatment period. **(d)** Images of tumors at the end of the treatment period. Data is presented as mean  $\pm$  s.d. ( $n = 5$ ).

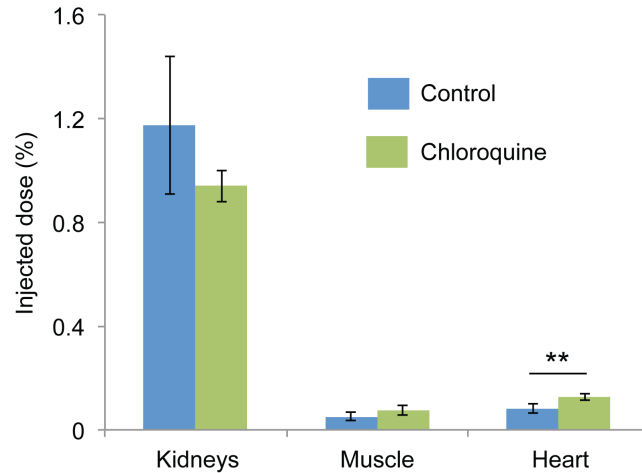

**Supplementary Figure 12 | Effect of chloroquine on the accumulation of silicon particles in the kidneys, muscle tissue, and heart.** Mice were pretreated with chloroquine (60 mg/kg/day for 7 days). Organs were harvested 15 min after intravenous injection of  $^{89}\text{Zr}$ -labeled silicon particles. The dose in 100  $\mu\text{g}$  of muscle tissue is shown. Data is presented as mean  $\pm$  s.d. of total organ accumulation ( $n = 5$ ). Statistics by Student's  $t$ -test. \*\*,  $P < 0.01$ .

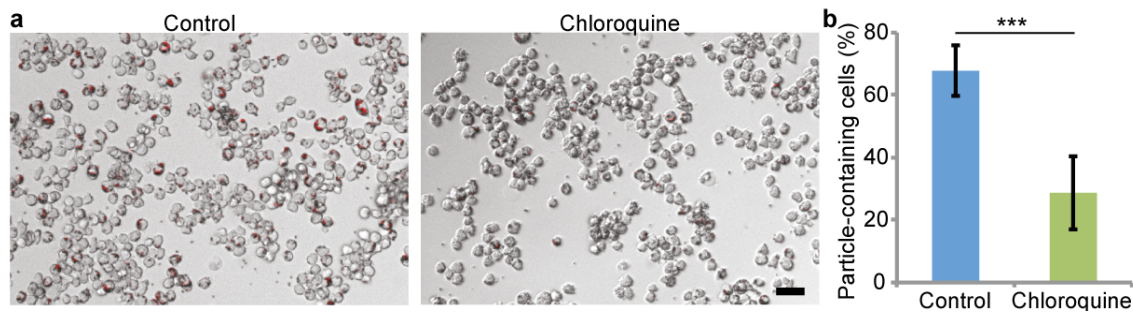

**Supplementary Figure 13 | Effect of chloroquine on the uptake of silicon particles in Kupffer cells.** Cells were pretreated with chloroquine (100  $\mu\text{M}$ ; 30 min) prior to exposure to fluorescently labeled silicon particles (3 h). (a) Representative images of cells. Scale bar, 50  $\mu\text{m}$ . (b) Quantification of particle uptake. Data is presented as mean  $\pm$  s.d. of 16 randomly selected regions (20x magnification). Statistics by Student's  $t$ -test. \*\*\*,  $P < 0.001$ .
